# Supplementary material for: Agro-food greenhouse gas emissions are increasingly driven by foreign demand
Source: Research Square preprint supplement (doi:10.21203/rs.3.rs-1838737/v1), 2022-07-13
Supplement: Supplementary file 1 [file 201999f287acd62527db0d98.pdf]

# Agro-food greenhouse gas emissions are increasingly driven by foreign demand

## *Supplementary information*

*Pablo Piñero<sup>1,2</sup>, Eduardo Aguilera<sup>1</sup>, Emiliano Travieso<sup>3</sup>, Juan Infante-Amate<sup>4</sup>, Martin Bruckner<sup>5</sup>, James Gerber<sup>6</sup>, Luis Lassaletta<sup>1</sup>, Nathan Mueller<sup>7</sup>, Alberto Sanz-Cobeña<sup>1</sup>*

<sup>1</sup>CEIGRAM, Universidad Politécnica de Madrid, Madrid, Spain.

<sup>2</sup>European Commission, Joint Research Centre, Seville, Spain.

<sup>3</sup>University Carlos III, Madrid, Spain.

<sup>4</sup>University of Granada, Granada, Spain.

<sup>5</sup>Global Resource Use, Institute for Ecological Economics, Vienna University of Economic and Business, Vienna, Austria.

<sup>6</sup>Institute on the Environment, University of Minnesota, Minneapolis, MN, USA.

<sup>7</sup>Department of Ecosystem Science and Sustainability, Department of Soil and Crop Sciences, Colorado State University, Fort Collins, CO, USA.

## CONTENTS

|                                                                                               |    |
|-----------------------------------------------------------------------------------------------|----|
| 1. Quality assurance.....                                                                     | 2  |
| 1.1. Comparison with other studies.....                                                       | 2  |
| 1.2. Analysis of GHG intensities of food products .....                                       | 5  |
| 1.3. Sensitivity analysis of amortization periods of land use change emissions.....           | 6  |
| 2. Supplementary results .....                                                                | 6  |
| 2.1. Carbon footprint of food consumption vs. domestic GHG emissions of food production ..... | 6  |
| 2.2. Income and fraction of food emissions embodied in the import trade .....                 | 11 |
| 2.3. Drivers of agro-food emissions embodied in trade .....                                   | 12 |
| 2.4. Leakage of emissions and aggregate per capita agro-food emissions.....                   | 13 |
| References .....                                                                              | 14 |

# 1. QUALITY ASSURANCE

## 1.1. Comparison with other studies

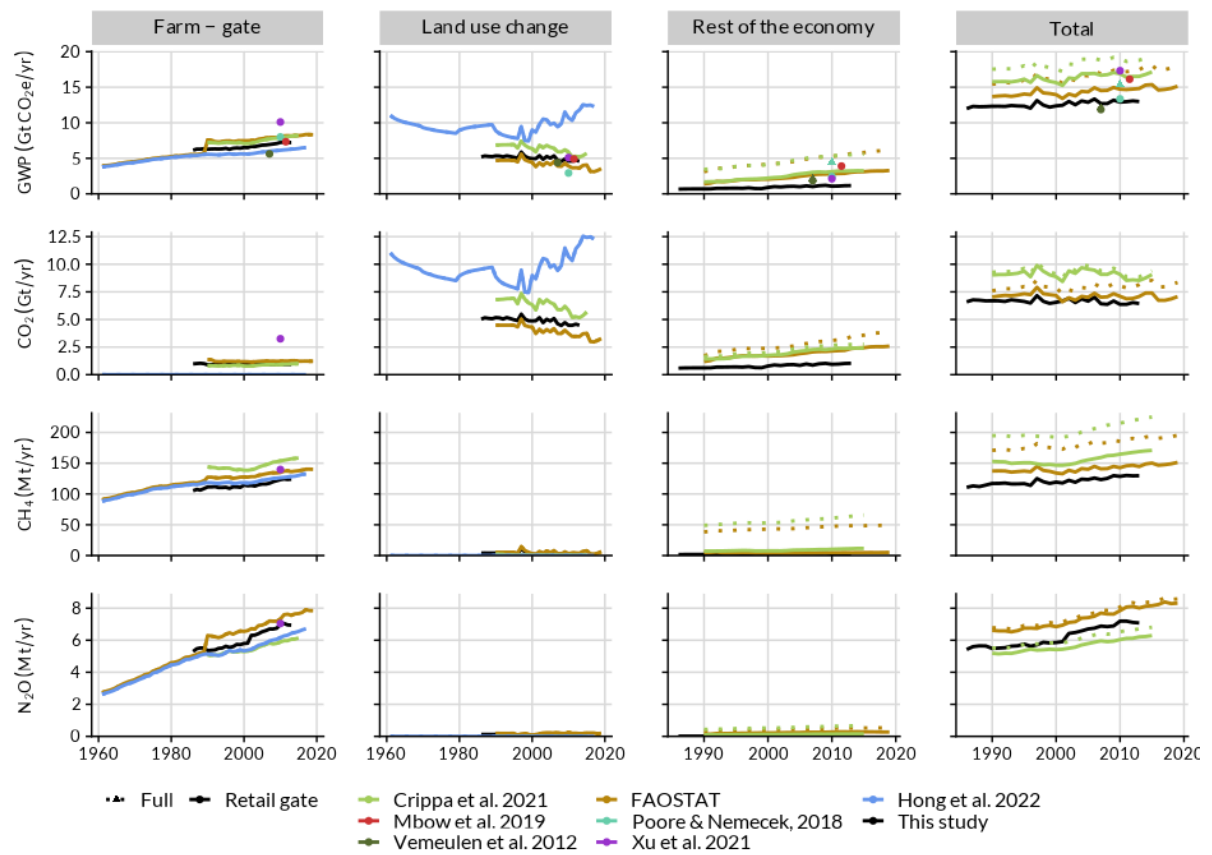

**Figure SI-1. Comparison of food system emissions estimated in our study with those estimated by other studies. Emissions are aggregated by food system stage (columns) and by gas (rows). GWP refers to Global Warming Potential. The distinction between 'Full' and 'Retail gate' refers to the inclusion or not (respectively) of post-retail emissions (food preparation in households, restaurants and caterings, and food waste management). This distinction is not made for farm-gate and LUC emissions.**

**Table SI-1. Summary of methodological differences across studies.**

|                         |            | This study             | Hong et al., 2022 <sup>1</sup>         | Tubiello et al., 2022 <sup>2</sup>   | Tubiello et al., 2021 <sup>3</sup> | Xu et al., 2021 <sup>4</sup>                             | Hong et al 2021 <sup>5</sup>           | Crippa et al., 2021 <sup>6</sup>    | Mbow et al., 2019 <sup>7</sup>                                              | Poore and Nemecek, 2018 <sup>8</sup>      | Bennetzen et al., 2016 <sup>9</sup> | Vermeulen et al., 2012 <sup>10</sup>                                             |
|-------------------------|------------|------------------------|----------------------------------------|--------------------------------------|------------------------------------|----------------------------------------------------------|----------------------------------------|-------------------------------------|-----------------------------------------------------------------------------|-------------------------------------------|-------------------------------------|----------------------------------------------------------------------------------|
| <b>Period</b>           |            | 1986-2013              | 2004,2007, 2011,2014, 2017             | 1990-2019                            | 1990 and 2018                      | 2007-2013 (mean)                                         | 1961-2017                              | 1990-2015                           | 2007-2016 (mean)                                                            | 2000-2016 studies, 2009-2011 sample       | 1970-2007-2050                      | ca. 2005-2008                                                                    |
| <b>Scope</b>            |            | Food consumption       | AFOLU, Food consumption                | Agro-food system, AFOLU              | Agro-food system, AFOLU            | Food consumption                                         | AFOLU                                  | Agro-food system                    | Agro-food system, AFOLU                                                     | Agro-food system                          | Agricultural production             | Agro-food system                                                                 |
| <b>Resolution</b>       |            | Country                | Country                                | Continent (by country in SI)         | AI-NAI <sup>a)</sup>               | Gridded-region                                           | Country                                | Country                             | Global                                                                      | Global                                    | Region                              | Global                                                                           |
| <b>Allocation</b>       |            | Economic/mass          | Not allocated                          | Not allocated                        | Not allocated                      | Energy/main product                                      | Not allocated <sup>b)</sup>            | Not allocated                       | Not allocated                                                               | Economic                                  | Dry matter                          | Not allocated                                                                    |
| <b>GWP<sup>c)</sup></b> |            | AR5 wCCF <sup>d)</sup> | AR5 wCCF <sup>d)</sup>                 | SAR <sup>e)</sup>                    | SAR <sup>e)</sup>                  | AR5 wCCF <sup>d)</sup>                                   | AR5 wCCF <sup>d)</sup>                 | AR5 woCCF <sup>f)</sup>             | AR5 woCCF <sup>f)</sup>                                                     | AR5 wCCF <sup>d)</sup>                    | SAR <sup>e)</sup>                   | NA                                                                               |
| <b>On-farm</b>          | Source     | FAOSTAT                | FAOSTAT. Energy not included           | FAOSTAT                              | FAOSTAT                            | ISAM model (Soil) - FAOSTAT (Animals)                    | FAOSTAT. Energy not included           | EDGAR, IEA <sup>11</sup>            | FAOSTAT and US EPA                                                          | Meta-analysis of literature <sup>g)</sup> | Estimated                           | Smith et al., 2007 <sup>12</sup>                                                 |
|                         | Method     | IPCC 2006 Tier 1       | IPCC 2006 Tier 1                       | IPCC 2006 Tier 1                     | IPCC 2006 Tier 1                   | IPCC 2006 Tier 1                                         | IPCC 2006 Tier 1                       | IPCC 2006 Tier 1 <sup>h)</sup>      | IPCC 2006 Tier 1                                                            | Literature <sup>i)</sup>                  | IPCC 1997 Tier 1                    | IPCC 1997 Tier 1                                                                 |
| <b>Pre-farm</b>         | Source     | EXIOBASE <sup>13</sup> |                                        | Tubiello et al., 2021b <sup>14</sup> | FAO, 2011 <sup>15</sup>            | Kool et al., 2012 <sup>16</sup>                          |                                        | EDGAR <sup>17</sup>                 | Poore and Nemecek, 2018 <sup>8</sup> , Fishedick et al., 2014 <sup>18</sup> | Meta-analysis of literature               | Estimated                           | Bellarby et al., 2008 <sup>19</sup> , Steinfeld et al., 2006 <sup>20</sup>       |
|                         | Method     | MRIO                   |                                        | LCA-based                            | Attribution to agriculture         | LCA-based                                                |                                        | Attribution to agriculture          | LCA-based, attribution to agriculture                                       | LCA-based                                 | Energy-based                        | LCA-based                                                                        |
| <b>LUC, forests</b>     | Source     | LUH2 <sup>21</sup>     | Blue <sup>22</sup> -LUH2 <sup>21</sup> | FAOSTAT <sup>j)</sup>                | FAOSTAT <sup>j)</sup>              | ISAM (Soil) <sup>23</sup> - LUH2 (Biomass) <sup>21</sup> | Blue <sup>22</sup> -LUH2 <sup>21</sup> | FAOSTAT <sup>k)</sup>               | FAOSTAT <sup>k)</sup>                                                       | Meta-analysis of literature <sup>l)</sup> | CDIAC <sup>24</sup>                 | van der Werf et al., 200 <sup>25</sup> 9, Blaser and Robledo, 2007 <sup>26</sup> |
|                         | Components | Biomass                | Soil and Biomass                       | Biomass and fire emissions           | Biomass and fire emissions         | Soil and Biomass                                         | Soil and Biomass                       | Biomass, burning, Annual emissions  | Biomass and fire emissions                                                  | Soil, Biomass fire emissions              | Biomass                             | Biomass                                                                          |
|                         | Method     | Amortization 100 years | Legacy                                 | Annual emissions                     | Annual emissions                   | Annual emissions                                         | Legacy                                 | Annual emissions                    | Annual emissions                                                            | Amortization 20 years                     | Legacy                              | NA                                                                               |
| <b>LUC, peat</b>        | Source     | FAOSTAT                | FAOSTAT                                | FAOSTAT                              | FAOSTAT                            |                                                          | FAOSTAT <sup>m)</sup>                  | FAOSTAT                             | FAOSTAT                                                                     | FAOSTAT                                   |                                     |                                                                                  |
|                         | Method     | IPCC 2006 tier 1       | IPCC 2006 tier 1                       | IPCC 2006 tier 1                     | IPCC 2006 tier 1                   |                                                          | IPCC 2006 tier 1                       | IPCC 2006 tier 1                    | IPCC 2006 tier 1                                                            | IPCC 2006 tier 1                          |                                     |                                                                                  |
| <b>Transport</b>        | Source     | EXIOBASE <sup>13</sup> |                                        | Various sources                      | Various sources                    | Ecoinvent <sup>27</sup> and Kinnon, 2011 <sup>28</sup>   |                                        | EDGAR <sup>17</sup> , Eurostat, FAO | Poore and Nemecek, 2018 <sup>8</sup> , Fishedick et al., 2014 <sup>18</sup> | Ecoinvent and James, 2010 <sup>29</sup>   |                                     | Chen and Zhang, 2010 <sup>30</sup>                                               |

|                   |               |                                            |                    |                                      |                            |                               |  |                                      |                                                                             |                             |  |                                    |
|-------------------|---------------|--------------------------------------------|--------------------|--------------------------------------|----------------------------|-------------------------------|--|--------------------------------------|-----------------------------------------------------------------------------|-----------------------------|--|------------------------------------|
|                   | <i>Method</i> | MRIO                                       |                    | Energy-based and attribution to food | Attribution to food        | LCA-based                     |  | Energy-based and attribution to food | LCA-based and attribution to food                                           | LCA-based                   |  | NA                                 |
| <b>Processing</b> | <i>Source</i> | IEA <sup>11</sup> , EXIOBASE <sup>13</sup> |                    | Tubiello et al., 2021b <sup>14</sup> | FAO, 2011 <sup>15</sup>    | NA                            |  | IEA <sup>11</sup>                    | Poore and Nemecek, 2018 <sup>8</sup> , Fishedick et al., 2014 <sup>18</sup> | Meta-analysis of literature |  | Chen and Zhang, 2010 <sup>30</sup> |
|                   | <i>Method</i> | Combustion-based                           |                    | Energy-based and attribution to food | Attribution to agriculture | LCA-based                     |  | Energy-based and attribution to food | LCA-based, attribution to agriculture                                       | LCA-based                   |  | NA                                 |
| <b>Packaging</b>  | <i>Source</i> | EXIOBASE <sup>13</sup>                     |                    | Tubiello et al., 2021b <sup>14</sup> | FAO, 2011 <sup>15</sup>    |                               |  | Various sources                      | Poore and Nemecek, 2018 <sup>8</sup> , Fishedick et al., 2014 <sup>18</sup> | Meta-analysis of literature |  | Chen and Zhang, 2010 <sup>30</sup> |
|                   | <i>Method</i> | MRIO                                       |                    | Energy-based and attribution to food | NA                         |                               |  | Energy-based and attribution to food | LCA-based, attribution to agriculture                                       | LCA-based                   |  | NA                                 |
| <b>Retail</b>     | <i>Source</i> | EXIOBASE <sup>13</sup>                     |                    | Tubiello et al., 2021b <sup>14</sup> | FAO, 2011 <sup>15</sup>    |                               |  |                                      |                                                                             |                             |  |                                    |
|                   | <i>Method</i> | MRIO                                       |                    | Energy-based and attribution to food | NA                         |                               |  |                                      |                                                                             |                             |  |                                    |
| <b>Trade</b>      | <i>Source</i> | FABIO <sup>31</sup>                        | GTAP <sup>32</sup> |                                      |                            | FAOSTAT detailed trade matrix |  |                                      |                                                                             |                             |  |                                    |
|                   | <i>Method</i> | MRIO                                       | MRIO               |                                      |                            | Bilateral trade <sup>n)</sup> |  |                                      |                                                                             |                             |  |                                    |

NA Not Available

<sup>a)</sup> Annex I and Non-Annex I countries.

<sup>b)</sup> They also provide an alternative scenario in which feed emissions are allocated to animals based on energy requirements.

<sup>c)</sup> Global warming potential. All studies use a 100-year time horizon.

<sup>d)</sup> Fifth Assessment Report, with climate change feedbacks.

<sup>e)</sup> Second Assessment Report.

<sup>f)</sup> Fifth Assessment Report, without climate change feedbacks.

<sup>g)</sup> Except savannah burning, from FAOSTAT, and fisheries, from Parker et al. (2018)<sup>33</sup>.

<sup>h)</sup> Except cattle enteric fermentation and rice (Tier 2).

<sup>i)</sup> Filling gaps with IPCC (2006)<sup>34</sup> Tiers 1 and 2, Ecoinvent<sup>27</sup>, Stehfest and Bouwman, 2006<sup>35</sup>, Tubiello et al., 2016<sup>36</sup>, EEA, 2016<sup>37</sup>.

<sup>j)</sup> New dataset which separates agriculture-related emissions.

<sup>k)</sup> Former dataset in which all emissions are attributed to agriculture.

<sup>l)</sup> Except cattle enteric fermentation and rice (Tier 2).

<sup>m)</sup> With assumptions to estimate the pre-1990 period.

<sup>n)</sup> Emission intensities of the exporter country are assumed for exports.

## 1.2. Analysis of GHG intensities of food products

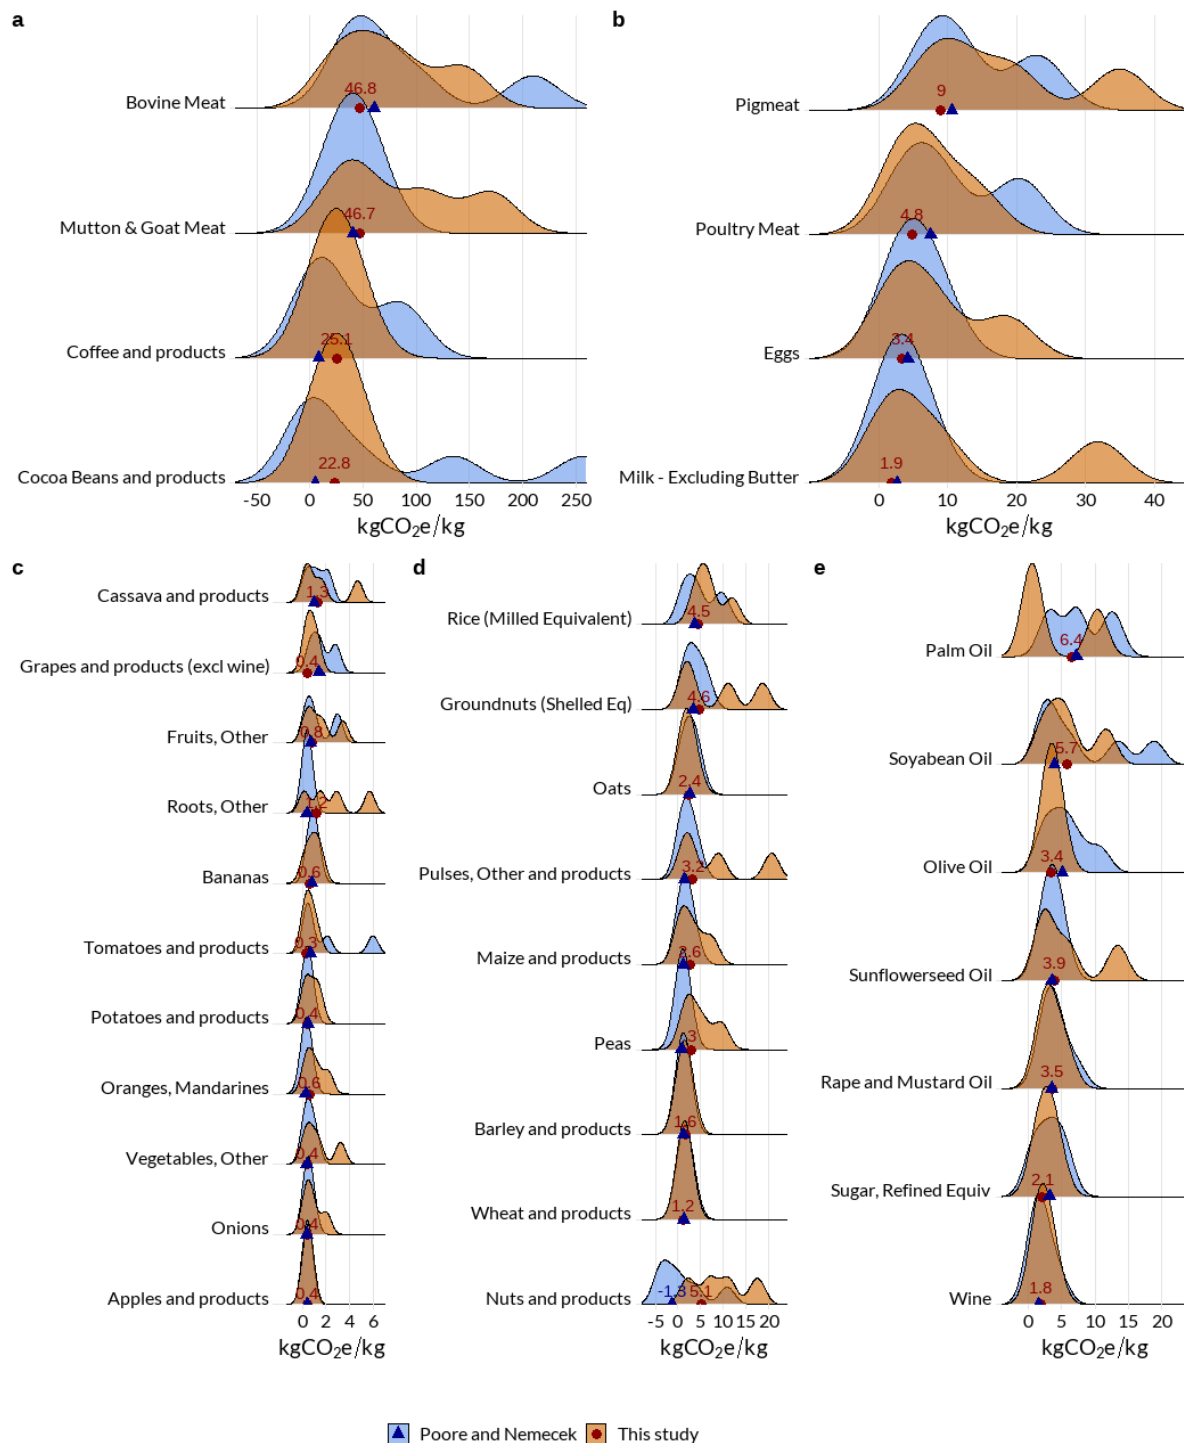

**Figure SI-2. Comparison of global variation in the carbon footprint of a selection of products in our study with the variation in a compilation of published life-cycle assessment studies reported by Poore and Nemecek<sup>8</sup>, 2018. The dots represent the weighted mean in our study and the median in Poore and Nemecek, 2018<sup>8</sup>. When the dots are very close, only the value of our study is shown to facilitate visualization. a. High-emissions animal and vegetal products; b. Vegetables, fruits, tubers and roots; c. Other animal products; d. Cereals, pulses and nuts; e. Processed vegetal products.**

### 1.3. Sensitivity analysis of amortization periods of land use change emissions

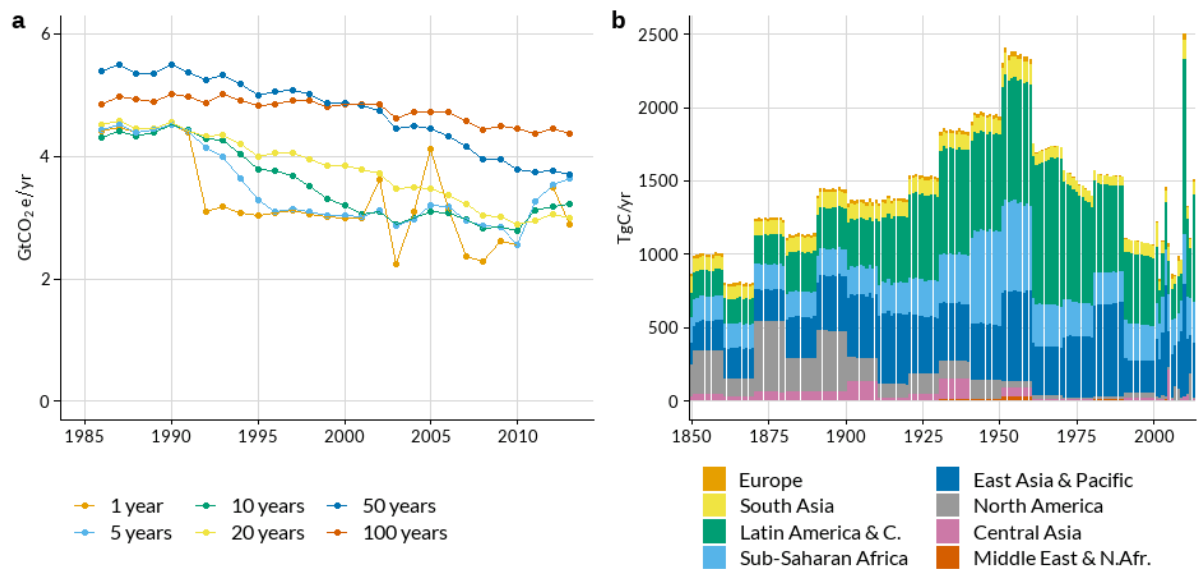

Figure SI-3. a. Land use change emissions by amortization period in the study years (1986-2013). b. Land use change-related carbon release by world region from 1850 to 2015 (LUH2 database).

## 2. SUPPLEMENTARY RESULTS

### 2.1. Carbon footprint of food consumption vs. domestic GHG emissions of food production

#### A. South Asia

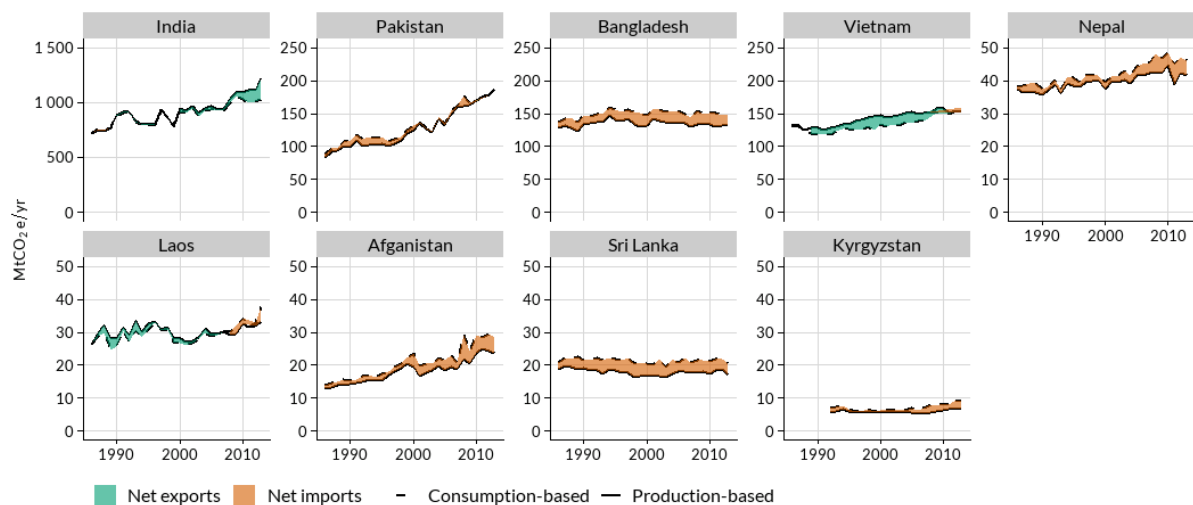

Figure SI-4. Carbon footprint of food consumption vs. domestic GHG emissions of food production in GtCO<sub>2</sub>e for South Asian countries.

## B. Europe

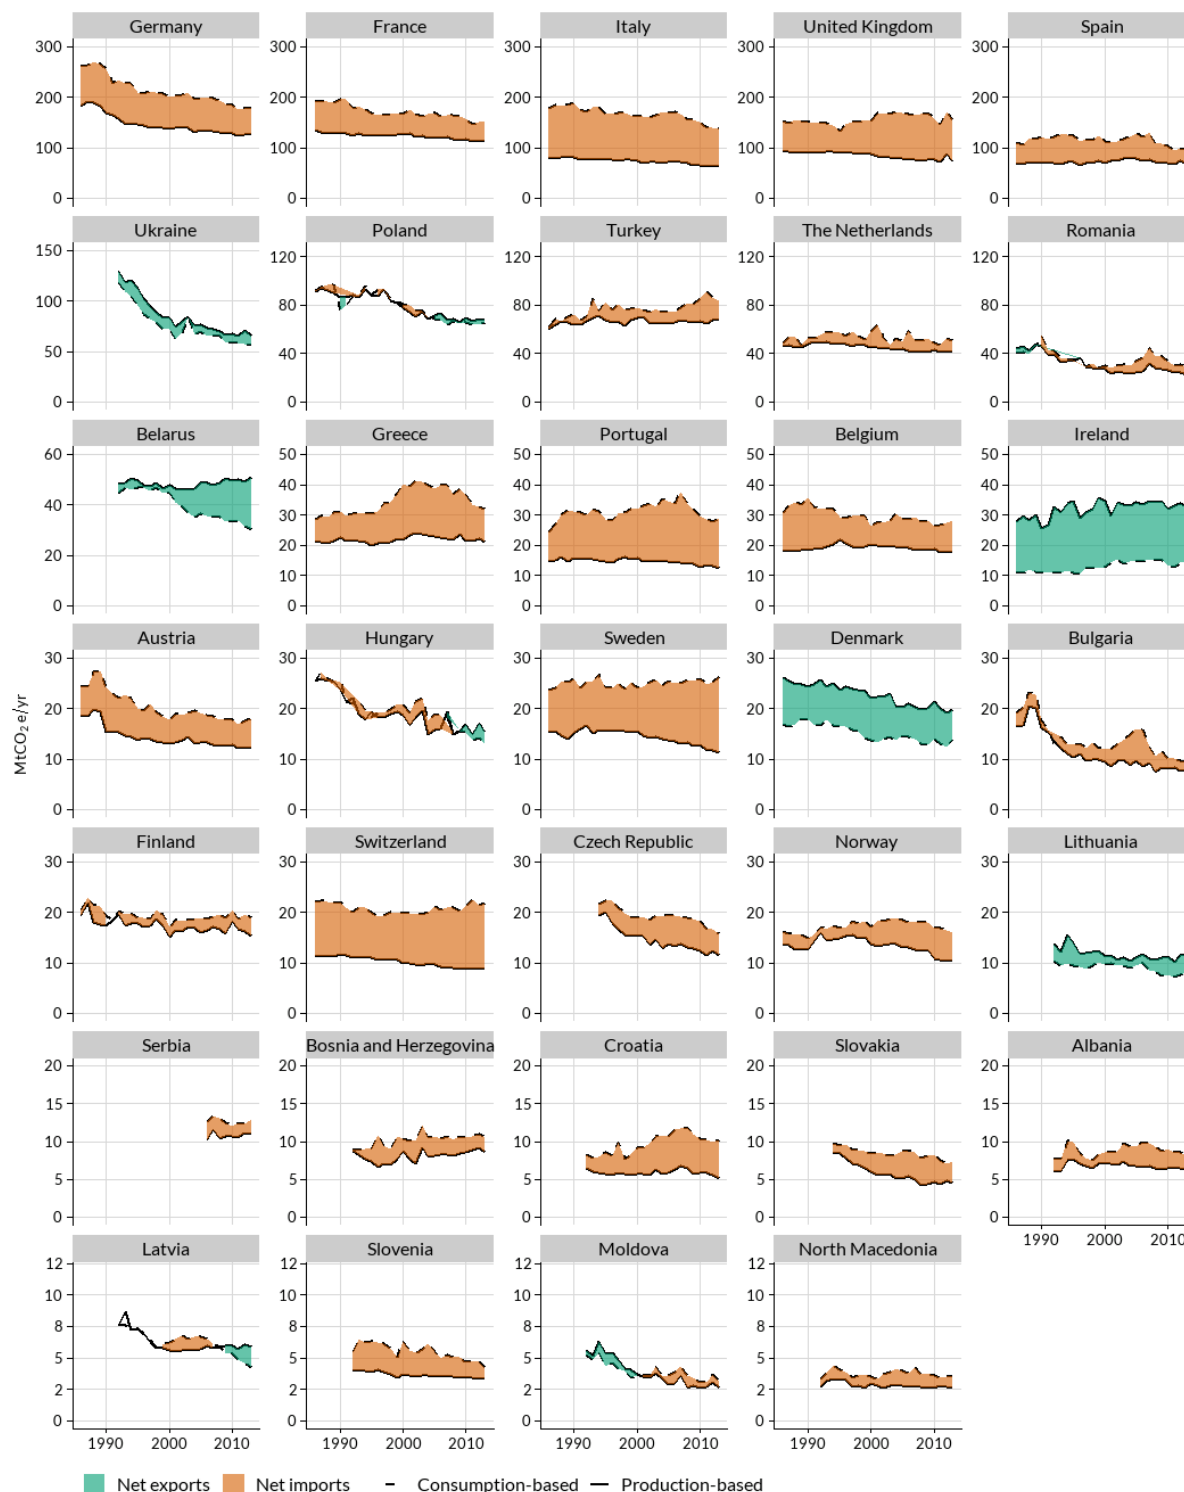

Figure SI-5. Carbon footprint of food consumption vs. domestic GHG emissions of food production in GtCO<sub>2</sub>e for European countries.

## C. Americas

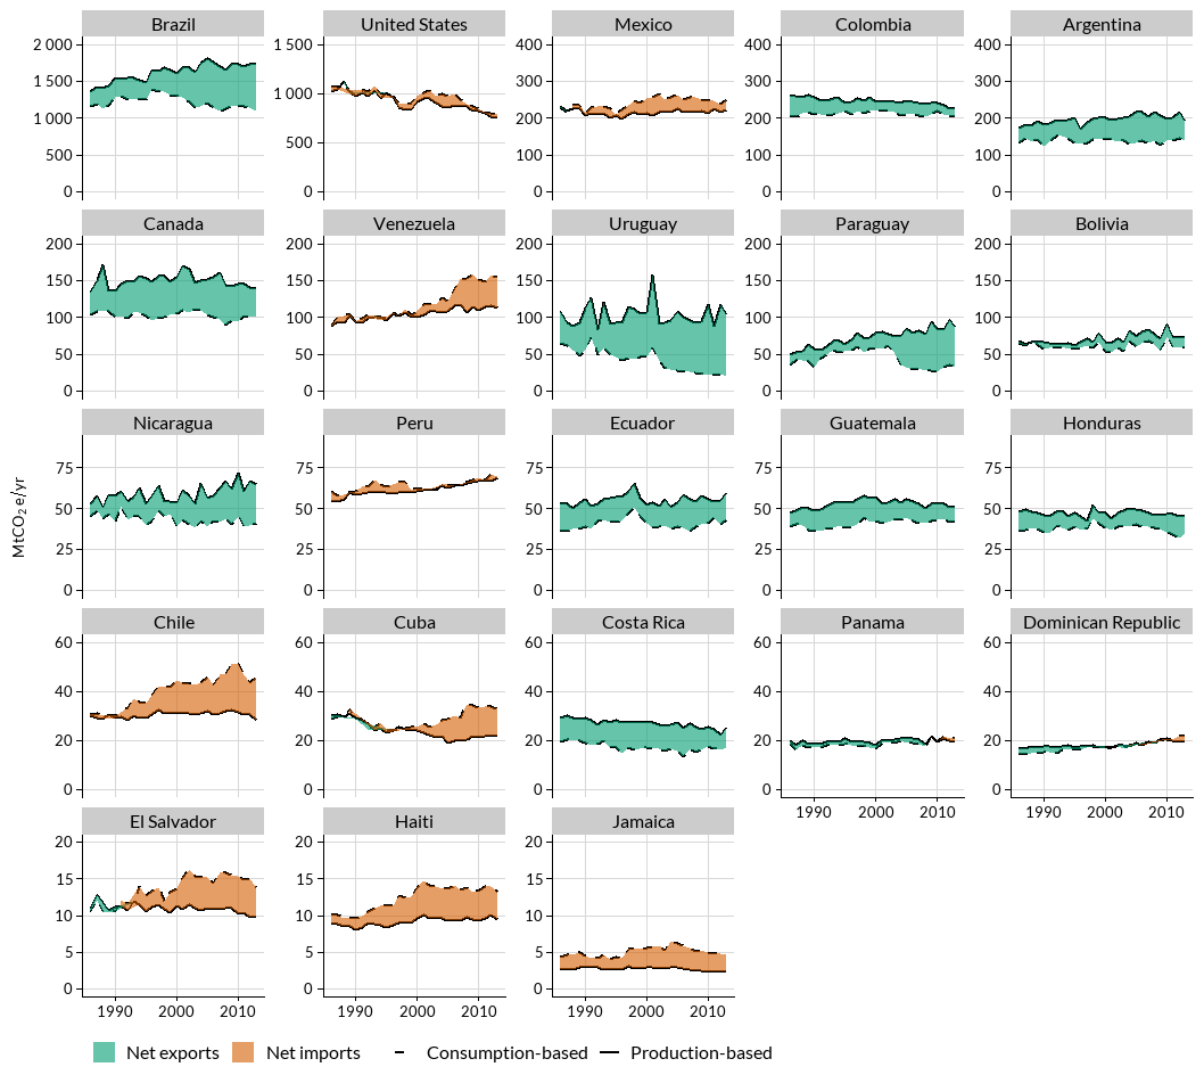

**Figure SI-6. Carbon footprint of food consumption vs. domestic GHG emissions of food production in GtCO<sub>2</sub>e for North American and Latin American countries.**



## D. Africa

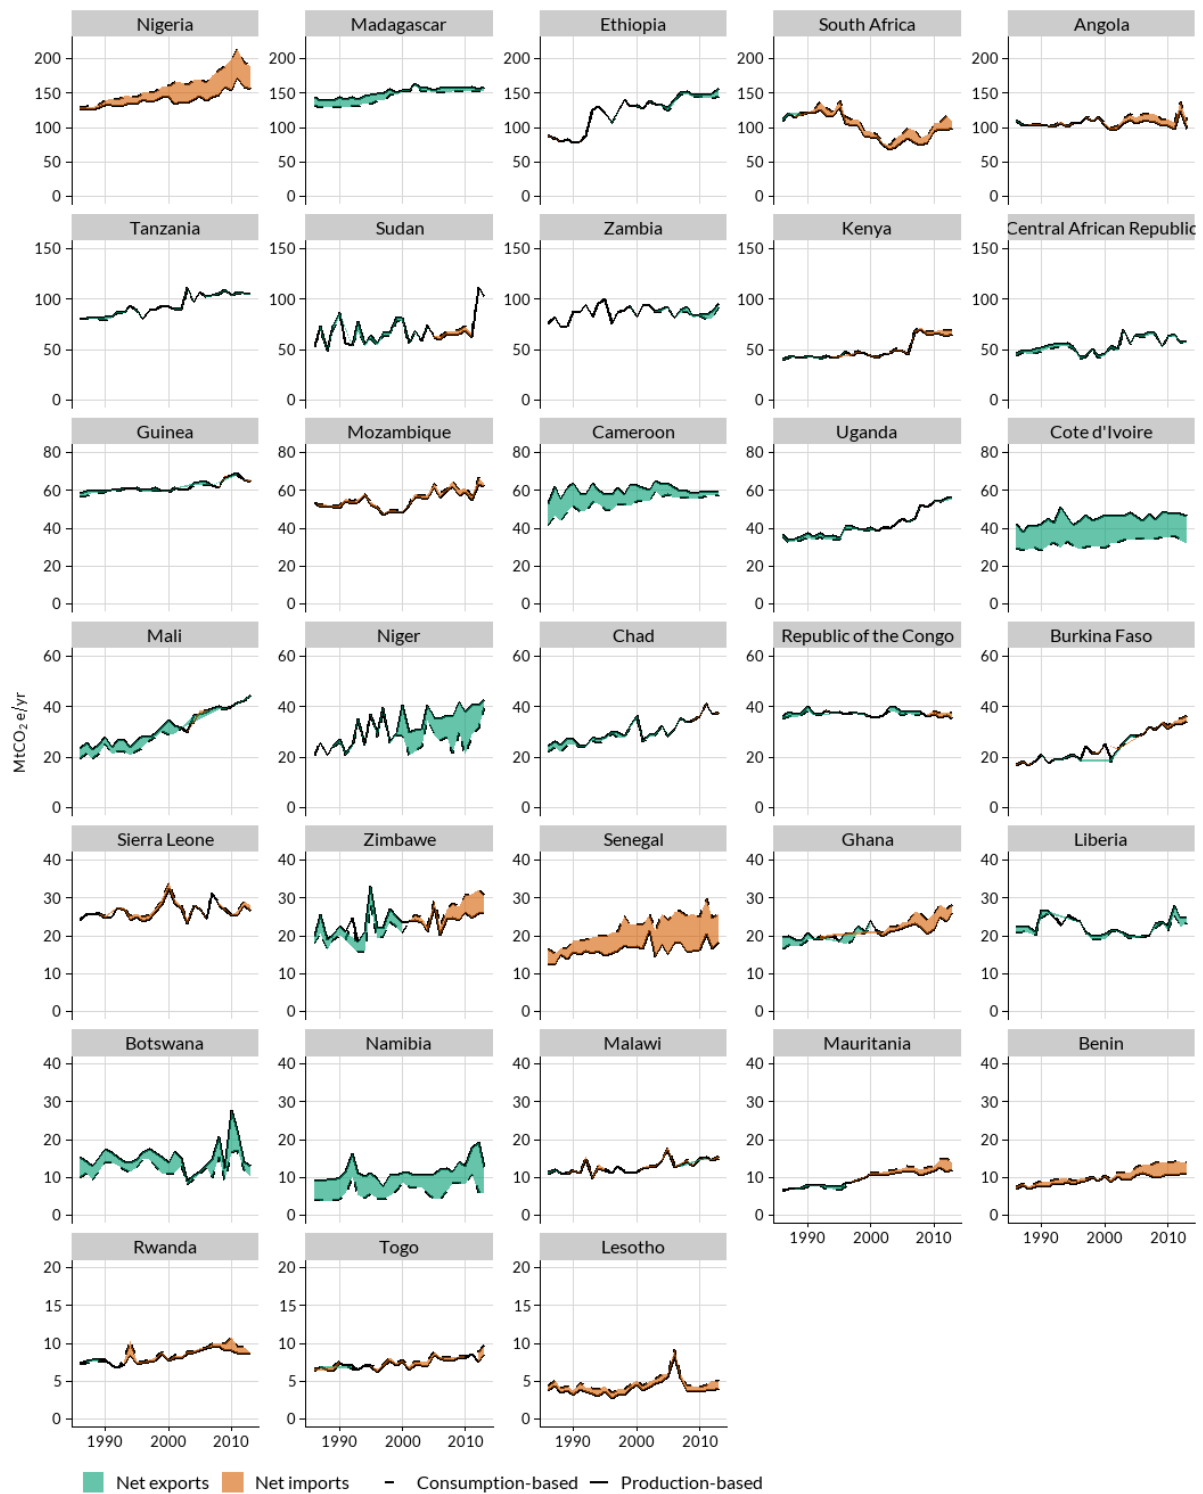

**Figure SI-7. Carbon footprint of food consumption vs. domestic GHG emissions of food production in GtCO<sub>2</sub>e for Sub-Saharan African countries.**

## E. Central Asia

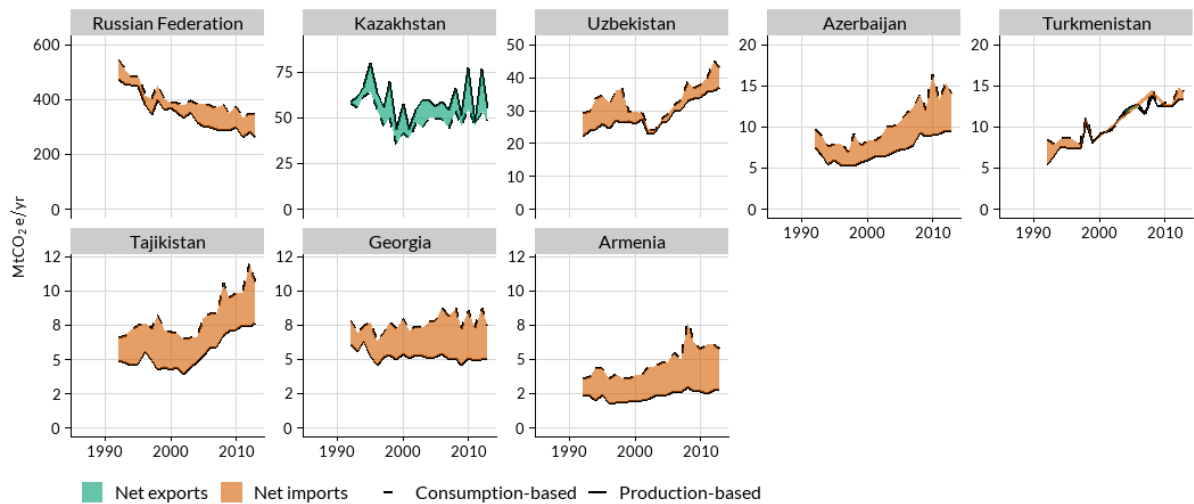

Figure SI-8. Carbon footprint of food consumption vs. domestic GHG emissions of food production in GtCO<sub>2</sub>e for Central Asian countries.

## F. Middle East and North Africa

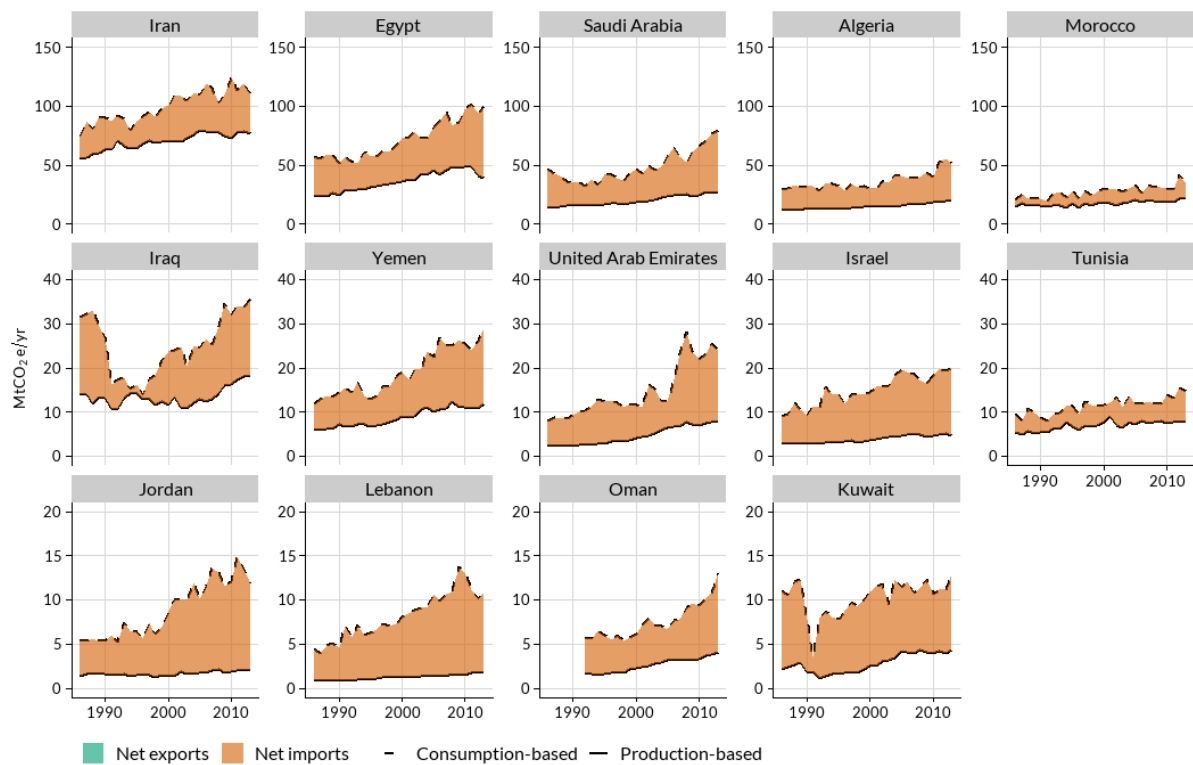

Figure SI-9. Carbon footprint of food consumption vs. domestic GHG emissions of food production in GtCO<sub>2</sub>e for Middle East and North African countries.

## G. East Asia & Pacific

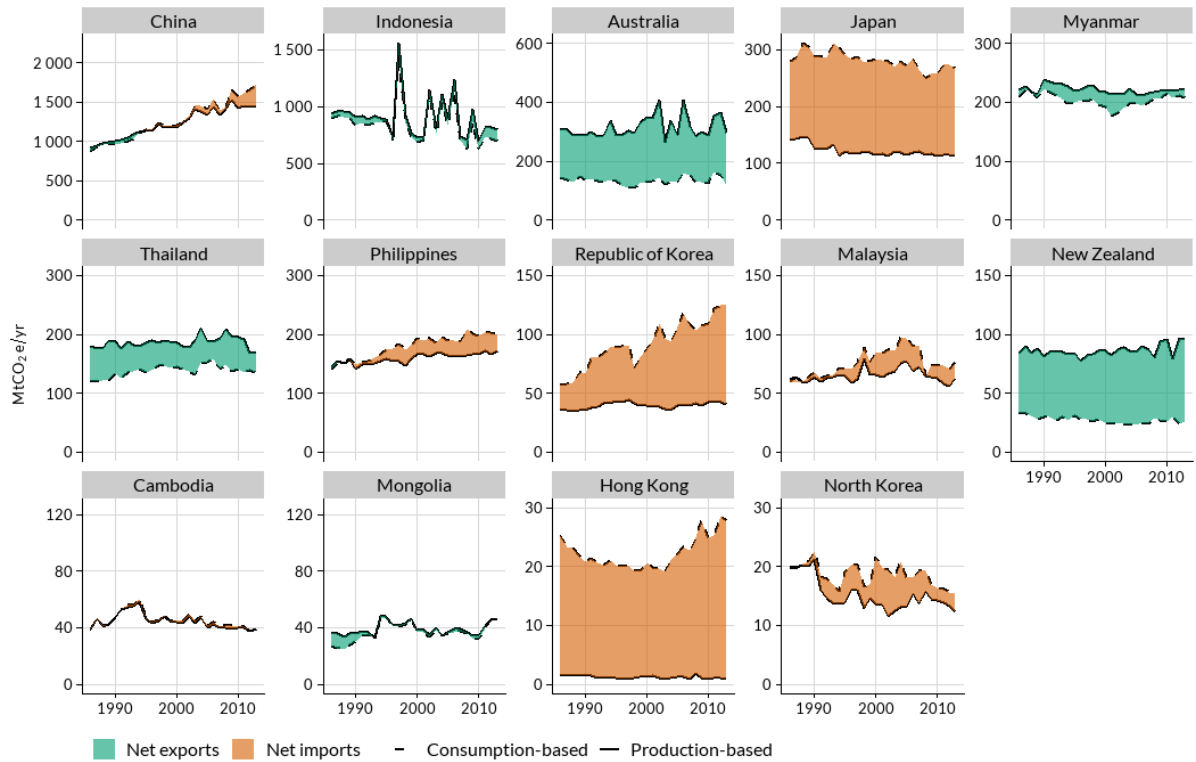

**Figure SI-10. Carbon footprint of food consumption vs. domestic GHG emissions of food production in GtCO<sub>2</sub>e for East Asia & Pacific countries.**

## 2.2. Income and fraction of food emissions embodied in the import trade

In our yearly dataset, higher incomes are associated at the country level with a higher fraction of emissions embodied in the agro-food import trade (Figure SI-11). This is in addition to the positive correlation between income and absolute food emissions embodied in imports.

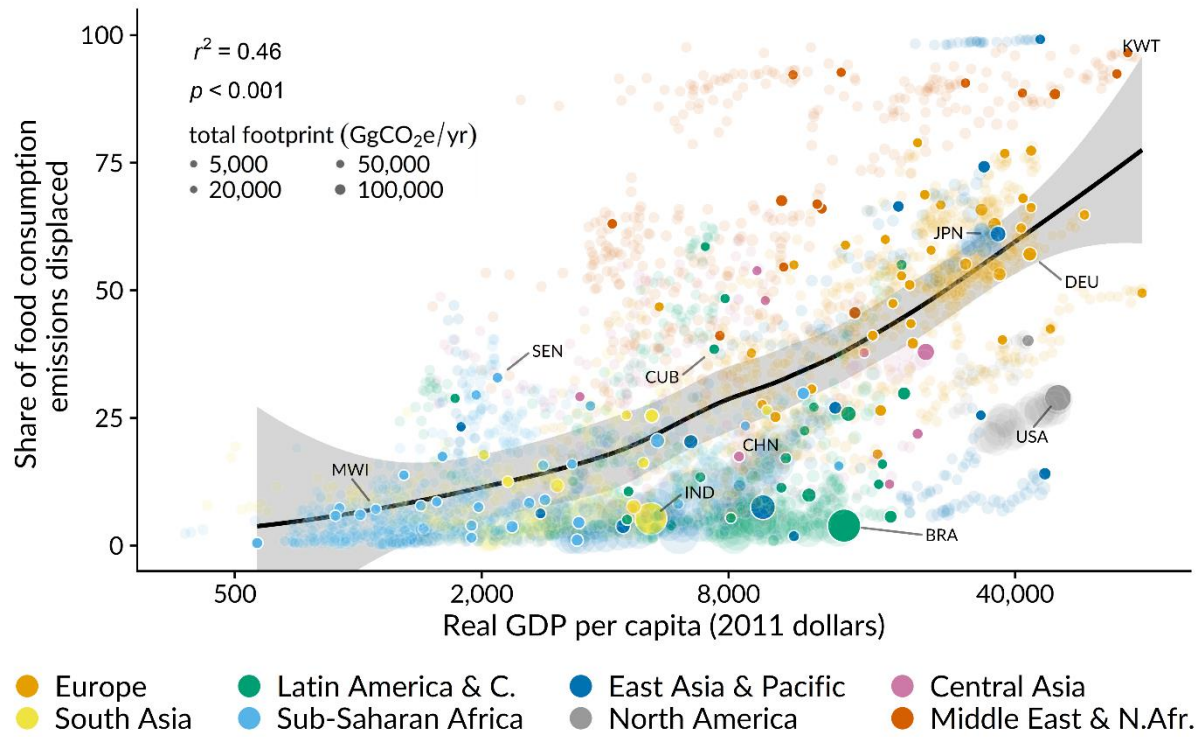

**Figure SI-11. Share of food consumption emissions displaced via imports (%) against average incomes (real GDP per capita in 2011 dollars, log scale). Highlighted dots, trendline and correlation coefficients refer only to 2013 data, transparent dots to observations 1986-2012. All countries with population > 2M included.**

### 2.3. Drivers of agro-food emissions embodied in trade

We conduct panel data regression to examine the impact of changes in income and population on agro-food emission displaced via trade. We estimate a combined entity and time fixed-effects model to control for unobserved confounders idiosyncratic to each country which affect agro-food consumption patterns (local environments, cultural traditions, population geography, etc.), as well as for unobserved variables which varied worldwide over time (such as global economic cycles and trade regulations). Our full model is an equation of the following form:

$$DE_{it} = \beta_1 Inc_{it} + \beta_2 Pop_{it} + \beta_3 (Pop_{it} \times Inc_{it}) + \alpha_i + \lambda_t + u_{it}$$

where  $DE_{it}$  is the dependent variable (displaced agro-food emissions per capita in country  $i$  in year  $t$ );  $Inc_{it}$  and  $Pop_{it}$  are the independent variables of interest (per capita income and population in country  $i$  in year  $t$ );  $(Pop_{it} \times Inc_{it})$  is an interaction term between them, so that  $\beta_3$  is the effect of a one-unit increase in income *and* population above and beyond the sum of the individual effects of an increase in population and income alone;  $\alpha_i$  ( $i=1...n$ ) is the intercept for each entity (i.e. the country fixed effect);  $\lambda_t$  is the intercept for each time period (i.e. the year fixed effect); and  $u_{it}$  is the error term.

The different specifications reported in table SI-3 allow us to focus on longitudinal variation (changes in each country relative to itself in the past, column 1), as well as to include both country and year fixed effects to concentrate on variation across time in each country outside of a general world time trend (columns 2-4). The last specification in column 4 includes the interacted regressor which allows the population effect on displaced emissions to depend on average incomes (and vice versa). Column 3 shows that the effect of income is still large even when accounting for population increase. The coefficients in column 4 show that population increases result in higher agro-food emission displacement only when average incomes increase at the same time. Standard errors are clustered at the country level in all cases to account for serial correlation.

Table SI-3. Impact of income per capita on displaced agro-food emissions per capita, 1986-2013.

|                              | (1)                 | (2)                 | (3)                 | (4)               |
|------------------------------|---------------------|---------------------|---------------------|-------------------|
| Income (GDP per capita, log) | 0.527***<br>(0.055) | 0.341***<br>(0.089) | 0.328***<br>(0.088) | 0.280<br>(0.395)  |
| Population (thousands, log)  |                     |                     | -0.304*<br>(0.157)  | -0.345<br>(0.347) |
| Population * Income          |                     |                     |                     | 0.005<br>(0.042)  |
| Country Fixed Effects        | Yes                 | Yes                 | Yes                 | Yes               |
| Year Fixed Effects           | No                  | Yes                 | Yes                 | Yes               |
| Observations                 | 3,493               | 3,493               | 3,493               | 3,493             |
| RMSE                         | 0.30                | 0.29                | 0.29                | 0.29              |

Notes: displaced agro-food emissions per capita (tCO<sub>2</sub>/yr/cap) as the dependent variable. Real GDP per capita (PPP, in 2011 dollars) and population (in thousands of people) as independent variables. Columns 1 shows panel data regression with country fixed effects; columns 2-4 show panel data regression with both country and year fixed effects; column 3 controls for population growth; column 4 shows panel data regression interacting GDP per capita and population. Clustered standard errors at the country level reported in brackets. Observations are year-country pairs. \*\*\*, \*\*, and \* denote significance at the 1%, 5%, and 10% levels.

Sources: displaced agro-food emissions from the dataset presented in this study; GDP per capita and population data from the Maddison Database<sup>38</sup>.

## 2.4. Leakage of emissions and aggregate per capita agro-food emissions

We conduct a further panel data regression analysis to consider whether leakage of agro-food emissions leads to larger or smaller emissions per capita *in the aggregate*, beyond the relationship of income levels on leakage. The regression equation is:

$$E_{it} = \beta_1 Mshare_{it} + \beta_2 Inc_{it} + \alpha_i + \lambda_t + u_{it}$$

where  $E_{it}$  is the dependent variable (total agro-food consumption emissions per capita in country  $i$  in year  $t$ );  $Mshare_{it}$  and  $Inc_{it}$  are the independent variables of interest (import share of total agro-food consumption emissions and per capita income in country  $i$  in year  $t$ );  $\alpha_i$  ( $i=1\dots n$ ) is the country fixed effect;  $\lambda_t$  is the year fixed effect; and  $u_{it}$  is the error term.

The results suggest that increasing the import share of a country's consumption footprint is associated with slightly lower total per capita emissions. When including both country and year fixed effects (column 3), as well as controlling for income, an increase of 1% in the import share of emissions is associated with a decrease of 0.06% in the total per capita agro-food consumption emissions. Clustered standard errors (at the country level) are always calculated to account for serial correlation.

Table SI-4. Impact of emission displacement on total per capita agro-food consumption emissions, 1986-2013.

|                                 | (1)                  | (2)                | (3)                  |
|---------------------------------|----------------------|--------------------|----------------------|
| Import share of emissions (log) | -0.146***<br>(0.025) | -0.049*<br>(0.027) | -0.063***<br>(0.028) |
| GDP per capita (log)            |                      |                    | 0.147***<br>(0.047)  |
| Country Fixed Effects           | Yes                  | Yes                | Yes                  |
| Year Fixed Effects              | No                   | Yes                | Yes                  |
| Observations                    | 3,493                | 3,493              | 3,493                |
| RMSE                            | 0.14                 | 0.13               | 0.13                 |

Notes: results obtained using total per capita agro-food consumption emissions (tCO<sub>2</sub>/yr/cap, in logs) as the dependent variable. Share of total agro-food consumption emissions displaced via imports (%) and real GDP per capita (PPP, in 2011 dollars) as independent variables. Column 1 shows the basic pooled OLS regression; columns 2-4 show panel data regressions with fixed effects. Clustered standard errors at the country level reported in brackets. Observations are year-country pairs. \*\*\*, \*\*, and \* denote significance at the 1%, 5%, and 10% levels.

Sources: agro-food emissions and import share from our own dataset; GDP per capita data from the Maddison Database<sup>38</sup>.

## REFERENCES

- 1 Hong, C. *et al.* Land-use emissions embodied in international trade. *Science* **376**, 597-603, doi:10.1126/science.abj1572 (2022).
- 2 Tubiello, F. N. *et al.* Pre- and post-production processes increasingly dominate greenhouse gas emissions from agri-food systems. *Earth Syst. Sci. Data* **14**, 1795-1809, doi:10.5194/essd-14-1795-2022 (2022).
- 3 Tubiello, F. N. *et al.* Greenhouse gas emissions from food systems: building the evidence base. *Environmental Research Letters* **16**, 065007, doi:10.1088/1748-9326/ac018e (2021).
- 4 Xu, X. *et al.* Global greenhouse gas emissions from animal-based foods are twice those of plant-based foods. *Nature Food* **2**, 724-732, doi:10.1038/s43016-021-00358-x (2021).
- 5 Hong, C. *et al.* Global and regional drivers of land-use emissions in 1961–2017. *Nature* **589**, 554-561, doi:10.1038/s41586-020-03138-y (2021).
- 6 Crippa, M. *et al.* Food systems are responsible for a third of global anthropogenic GHG emissions. *Nature Food* **2**, 198-209, doi:10.1038/s43016-021-00225-9 (2021).
- 7 Mbow, C. *et al.* Food Security. In *Climate Change and Land: an IPCC special report on climate change, desertification, land degradation, sustainable land management, food security, and greenhouse gas fluxes in terrestrial ecosystems* (2019).
- 8 Poore, J. & Nemecek, T. Reducing food's environmental impacts through producers and consumers. *Science* **360**, 987-992, doi:10.1126/science.aaq0216 (2018).
- 9 Bennetzen, E. H., Smith, P. & Porter, J. R. Agricultural production and greenhouse gas emissions from world regions—The major trends over 40 years. *Global Environmental Change* **37**, 43-55, doi:10.1016/j.gloenvcha.2015.12.004 (2016).

- 10 Vermeulen, S. J., Campbell, B. M. & Ingram, J. S. I. Climate Change and Food Systems. *Annual Review of Environment and Resources* **37**, 195-222, doi:10.1146/annurev-environ-020411-130608 (2012).
- 11 International Energy Agency. World Energy Balances 2019 Edition. Database Documentation (2019).
- 12 Smith, P. *et al.* Policy and technological constraints to implementation of greenhouse gas mitigation options in agriculture. *Agriculture, Ecosystems & Environment* **118**, 6-28, doi:10.1016/j.agee.2006.06.006 (2007).
- 13 Stadler, K. *et al.* EXIOBASE 3: Developing a Time Series of Detailed Environmentally Extended Multi-Regional Input-Output Tables. *Journal of Industrial Ecology* **22**, 502-515, doi:10.1111/jiec.12715 (2018).
- 14 Tubiello, F. N. *et al.* Methods for estimating greenhouse gas emissions from food systems. Part III: energy use in fertilizer manufacturing, food processing, packaging, retail and household consumption. (Food and Agriculture Organization of the United Nations, Rome, 2021).
- 15 FAO. Energy-smart food for people and the planet. (Food and Agriculture Organization of the United Nations, Rome, 2011).
- 16 Kool, A., Marinussen, M. & Blonk, H. LCI data for the calculation tool Feedprint for greenhouse gas emissions of feed production and utilization. GHG Emissions of N, P and K fertilizer production. (2012).
- 17 European Commission *et al.* GHG emissions of all world : 2021 report. (Publications Office of the European Union, 2021).
- 18 Fishedick, M. *et al.* in *Climate Change 2014: Mitigation of Climate Change. Contribution of Working Group III to the Fifth Assessment Report of the Intergovernmental Panel on Climate Change* (eds O. Edenhofer *et al.*) (Cambridge University Press, 2014).
- 19 Bellarby, J., Foereid, B., Hastings, A., and Smith, P. Cool Farming: Climate Impacts of Agriculture and Mitigation Potential. (Amsterdam, 2008).
- 20 Steinfeld, H. *et al.* *Livestock's Long Shadow: Environmental Issues and Options*. Vol. 24 (2006).
- 21 Hurtt, G. C. *et al.* Harmonization of global land use change and management for the period 850–2100 (LUH2) for CMIP6. *Geosci. Model Dev.* **13**, 5425-5464, doi:10.5194/gmd-13-5425-2020 (2020).
- 22 Hansis, E., Davis, S. J. & Pongratz, J. Relevance of methodological choices for accounting of land use change carbon fluxes. *Global Biogeochemical Cycles* **29**, 1230-1246, doi: 10.1002/2014GB004997 (2015).
- 23 Jain, A. K. & Yang, X. Modeling the effects of two different land cover change data sets on the carbon stocks of plants and soils in concert with CO<sub>2</sub> and climate change. *Global Biogeochemical Cycles* **19**, doi: 10.1029/2004GB002349 (2005).
- 24 Houghton, R. A. in *TRENDS: A Compendium of Data on Global Change* (Carbon Dioxide Information Analysis Center, 2008).
- 25 van der Werf, G. R. *et al.* CO<sub>2</sub> emissions from forest loss (vol 2, pg 737, 2009). *Nature Geoscience* **2**, 829-829 (2009).
- 26 Blaser, J. & Robledo, C. Initial analysis of the mitigation potential in the forestry sector. (UNFCCC, Bern, 2007).
- 27 Wernet, G. *et al.* The ecoinvent database version 3 (part I): overview and methodology. *The International Journal of Life Cycle Assessment* **21**, 1218-1230, doi:10.1007/s11367-016-1087-8 (2016).
- 28 Kinnon, A. Guidelines for Measuring and Managing CO<sub>2</sub> Emission from Freight Transport Operations. (European Chemical Industry Council, 2011).
- 29 James, S. J. & James, C. The food cold-chain and climate change. *Food Research International* **43**, 1944-1956, doi: 10.1016/j.foodres.2010.02.001 (2010).

- 30 Chen, G. Q. & Zhang, B. Greenhouse gas emissions in China 2007: Inventory and input-output analysis. *Energy Policy* **38**, 6180-6193, doi:10.1016/j.enpol.2010.06.004 (2010).
- 31 Bruckner, M. *et al.* FABIO—The Construction of the Food and Agriculture Biomass Input–Output Model. *Environmental Science & Technology* **53**, 11302-11312, doi:10.1021/acs.est.9b03554 (2019).
- 32 Aguiar, A., Chepeliev, M., Corong, E. L., McDougall, R. & van der Mensbrugghe, D. The GTAP Data Base: Version 10. 2019 **4**, 27, doi:10.21642/jgea.040101af (2019).
- 33 Parker, R. W. R. *et al.* Fuel use and greenhouse gas emissions of world fisheries. *Nature Climate Change* **8**, 333-337, doi:10.1038/s41558-018-0117-x (2018).
- 34 Intergovernmental Panel on Climate Change (IPCC). 2006 IPCC Guidelines for National Greenhouse Gas Inventories, Prepared by the National Greenhouse Gas Inventories Programme. (2006).
- 35 Stehfest, E. & Bouwman, L. N<sub>2</sub>O and NO emission from agricultural fields and soils under natural vegetation: summarizing available measurement data and modeling of global annual emissions. *Nutrient Cycling in Agroecosystems* **74**, 207-228, doi:10.1007/s10705-006-9000-7 (2006).
- 36 Tubiello, F. N., Biancalani, R., Salvatore, M., Rossi, S. & Conchedda, G. A Worldwide Assessment of Greenhouse Gas Emissions from Drained Organic Soils. *Sustainability* **8**, 371 (2016).
- 37 European Environment Agency (EEA). EMEP/EEA air pollutant emissions inventory guidebook 2016: Technical guidance to prepare national emissions inventories. Report 21/2016 (2016).
- 38 Bolt, J. & Zanden, J. L. v. Maddison Project Database, version 2020. Maddison style estimates of the evolution of the world economy. A new 2020 update (2020).
